# Supplementary material for: Facile synthesis of a fluorescent probe based on a terbium-based metal–organic framework for selective detection of Fe(iii) and Al(iii)
Source: Royal Society of Chemistry journal article supplement (doi:10.1039/d3nj01358h), 2023-01-01
Supplement: d3nj01358h1.pdf [file d3nj01358h1.pdf]

## Supporting Information

### **Facile synthesis of fluorescent probe based on Terbium-based metal-organic framework for selective detection of Fe(III) and Al(III)**

Xuequan Jing<sup>a,b,c</sup>, Jiaming Liu<sup>a,b,c</sup>, Meina Guo<sup>a,b,f</sup>, Guoliang Chen<sup>a,d</sup>, Guoqing Ren<sup>e</sup>, Jiarong Li<sup>a,b,c</sup>, Haonan Qin<sup>a,b,c</sup>, Zhangwei Yao<sup>a,b,c</sup>, Yinhua Wan<sup>a,b,c,f,g</sup>, Weijie Song<sup>a,b,c,f,g</sup>, Huifeng Zeng<sup>a,b,f</sup>, Feifei Yang<sup>a,b,f</sup>, Da Zhao<sup>a,b,f</sup>, Kang Hu<sup>a,b,c,f,\*</sup>

<sup>a</sup>Ganjiang Innovation Academy, Chinese Academy of Sciences, Ganzhou 341000, P. R. China

<sup>b</sup>Key Laboratory of Rare Earth, Chinese Academy of Sciences, Ganzhou 341000, P. R. China

<sup>c</sup>School of Rare Earths, University of Science and Technology of China, Hefei, Anhui 230026, P. R. China

<sup>d</sup>China Rare Earth Group Co., Ltd, Ganzhou 341000, P. R. China

<sup>e</sup>Jiangxi ECO-ADVANCE Technology Co., LTD, Ganzhou 341000, P. R. China

<sup>f</sup>Jiangxi Province Key Laboratory of Cleaner Production of Rare Earths, Ganzhou 341000, P. R. China

<sup>g</sup>Institute of Process Engineering, Chinese Academy of Sciences, Beijing 100190, P. R. China

\*Corresponding author. E-mail address: hukang0602@126.com (K. Hu)

Keywords: selective detection; metal-organic framework; ferric ions (Fe<sup>3+</sup>); aluminum ions (Al<sup>3+</sup>)

**Table S1** The comparison between fluorescent probe for selective detection of Fe<sup>3+</sup> and Al<sup>3+</sup> prepared in this work with partial updated reported literatures.

| Probe                                                                                                                   | Chemicals                                                                                                                                                           | Synthetic conditions                                                                                                               | Detection limits                                               | Linear range                                                                   | Ref. |
|-------------------------------------------------------------------------------------------------------------------------|---------------------------------------------------------------------------------------------------------------------------------------------------------------------|------------------------------------------------------------------------------------------------------------------------------------|----------------------------------------------------------------|--------------------------------------------------------------------------------|------|
| 4-HMP-PDI                                                                                                               | N,N'-bis(hexyl)1,7-dibromoperylenetetracarboxylic diimide, 4-pyridinemethanol, K <sub>2</sub> CO <sub>3</sub> and DMF                                               | 120-130 °C for 7 h under N <sub>2</sub> atmosphere, monitored by TLC, under vacuum, purified by silica column with hexane.         | 36.52 ppb of Fe <sup>3+</sup><br>43.12 ppb of Al <sup>3+</sup> | 0 ppm to 4.95 ppm of Fe <sup>3+</sup><br>0 ppm to 3.24 ppm of Al <sup>3+</sup> | 1    |
| Perylenetetracarboxylicdiimide fluorophore with an amine unit                                                           | Pd <sub>2</sub> (dba) <sub>3</sub> , 2,2'-bis(diphenylphosphino)-1,1'-binaphthalene, toluene, 1-adamantlyamine, dibromo-PDI, sodium tert-butoxide and diethyl ether | stirred for 30 min at room temperature, stirred for 24 h at 100°C.                                                                 | 2.16 μM of Fe <sup>3+</sup><br>3.47μM of Al <sup>3+</sup>      | 0 μM to 20 μM for Fe <sup>3+</sup><br>0 μM to 20 μM for Al <sup>3+</sup>       | 2    |
| Rhodamine-thiophene-based fluorogenic probe                                                                             | N-(Rhodamine-6G) lactam-ethylenediamine (LA), thiophene-2-carboxylic acid, EDC, 4-dimethylamino pyridine and CH <sub>2</sub> Cl <sub>2</sub> .                      | stirred at room temperature for 12 h, washed with water and concentrated in a vacuum, purified by chromatography.                  | 5 μM of Fe <sup>3+</sup><br>6 μM of Al <sup>3+</sup>           | ----                                                                           | 3    |
| Förster resonance energy transfer (FRET)-based fluorescent probe                                                        | rhodamine hydrazide, absolute methanol, 4-pyridinecarboxaldehyde, NaHCO <sub>3</sub> and CH <sub>2</sub> Cl <sub>2</sub>                                            | dried over anhydrous Na <sub>2</sub> SO <sub>4</sub> and evaporated using rotary evaporator, purification by column chromatography | ----                                                           | 35 μM to 115 μM for Fe <sup>3+</sup>                                           | 4    |
| Cadmium-based 3D luminescent MOF ([Cd <sub>2</sub> (SA) <sub>2</sub> (L) <sub>2</sub> ·H <sub>2</sub> O] <sub>n</sub> ) | Cd(NO <sub>3</sub> ) <sub>2</sub> ·4H <sub>2</sub> O, succinic acid, 3,3'-azobis(pyridine) and DMF                                                                  | stirred for 1-2 h, kept for crystallization at ambient temperature for 15-18 days.                                                 | 2.4 μM of Fe <sup>3+</sup><br>9.3 μM of Al <sup>3+</sup>       | 2 μM to 20 μM for Fe <sup>3+</sup><br>2 μM to 20 μM for Al <sup>3+</sup>       | 5    |
| A trichromatic and white-light-emitting MOF composite                                                                   | H <sub>2</sub> L, ZnBr <sub>2</sub> , DMF and H <sub>2</sub> O                                                                                                      | heated at 105 °C for 24 h, collected by filtration, washed with DMF and dried in air.                                              | 0.41 ppm of Fe <sup>3+</sup><br>0.12 ppm of Al <sup>3+</sup>   | 0 to 1.50 mM for Fe <sup>3+</sup><br>0 to 1.50 mM for Al <sup>3+</sup>         | 6    |

|                                                                                   |                                                                                                                                        |                                                                                                                 |                                                                 |                                                                              |    |
|-----------------------------------------------------------------------------------|----------------------------------------------------------------------------------------------------------------------------------------|-----------------------------------------------------------------------------------------------------------------|-----------------------------------------------------------------|------------------------------------------------------------------------------|----|
| PYTG based on pyrene and a C <sub>3</sub> -symmetric triaminoguanidinium core     | Triaminoguanidinium chloride, ethanol, H <sub>2</sub> O and pyrene-1-carboxaldehyde                                                    | stirred and refluxed for 12 h at 85°C, filtered and washed 3 times with diethyl ether.                          | 5.4 nM of Fe <sup>3+</sup><br>14 nM of Al <sup>3+</sup>         | 0.5 μM to 3 μM for Fe <sup>3+</sup><br>30 μM to 80 μM for Al <sup>3+</sup>   | 7  |
| 2-(((4-(9H-carbazol-9-yl)phenyl)imino)methyl)-5-(diphenylamino)phenol (para-CPDP) | 3-OH TPA aldehyde, methanol solution, Pd/C, NaBH <sub>4</sub> , carbazole, CH <sub>3</sub> CN, sodium hydride, 2-/4-fluoronitrobenzene | stirred for 4 h at room temperature, stirred for another 2 h, the reaction mixture was refluxed for overnight.  | 10 μM of Fe <sup>3+</sup><br>500 μM of Al <sup>3+</sup>         | 2.5 μM to 15 μM for Fe <sup>3+</sup><br>2.5 μM to 15 μM for Al <sup>3+</sup> | 8  |
| Cd(II)-based MOF                                                                  | Cd(NO <sub>3</sub> ) <sub>2</sub> ·6H <sub>2</sub> O, PAM, 4-bpdb, DMF and H <sub>2</sub> O                                            | heated at 100°C under autogenous pressure for 4 days                                                            | 0.3 μM of Fe <sup>3+</sup><br>0.56 μM of Al <sup>3+</sup>       | 0 μM to 16 μM for Fe <sup>3+</sup><br>0 μM to 50 μM for Al <sup>3+</sup>     | 9  |
| Organic gelator (WJ) based on benzimidazole and acylhydrazone naphthol moieties   | N-methoxycarbonylmethyl-2-undecyl-1H-benzimidazole, EtOH, hydrazine, 2-hydroxy naphthalene formaldehyde, acetic acid and DMF           | stirred under reflux for 10 h at 80°C, heated at 80°C for 8 h.                                                  | 0.00381 μM of Fe <sup>3+</sup><br>0.0578 μM of Al <sup>3+</sup> | 40 μM to 160 μM for Fe <sup>3+</sup><br>1 μM to 3 μM for Al <sup>3+</sup>    | 10 |
| Schiff-base (HL) based on rhodamine B                                             | (4-Hydroxybenzoyl)hydrazine, rhodamine B, methanol, hydrazine hydrate                                                                  | removed under reduced pressure, washed with deionized water and dried under reduced pressure.                   | 0.14 μM of Fe <sup>3+</sup><br>0.22 μM of Al <sup>3+</sup>      | 20 μM to 22 μM for Fe <sup>3+</sup><br>20 μM to 22 μM for Al <sup>3+</sup>   | 11 |
| Zn(II)-coordination polymer                                                       | Zn(NO <sub>3</sub> ) <sub>2</sub> ·6H <sub>2</sub> O, H <sub>3</sub> CIP, pbt, H <sub>2</sub> O and DMF                                | kept at 120 °C for 3 days                                                                                       | 3.3 ppm of Fe <sup>3+</sup><br>0.764 ppm of Al <sup>3+</sup>    | 0 μM to 150 μM for Fe <sup>3+</sup><br>75 μM to 425 μM for Al <sup>3+</sup>  | 12 |
| Nitrobenzoxadiazole-Appended Calix[4] arene Conjugate (L)                         | Precursors P2, P3 and 4-chloro-7-nitrobenzo-2-oxa-1,3-diazole (NBD-Cl), dichloromethane and triethylamine                              | stirred for 48 h, checked by TLC using 50% ethyl acetate in petroleum ether, purified by column chromatography. | 1.7 ppm of Fe <sup>3+</sup><br>2.3 ppm of Al <sup>3+</sup>      | 0 μM to 3 μM for Fe <sup>3+</sup><br>0 μM to 2 μM for Al <sup>3+</sup>       | 13 |

|                                                               |                                                                                                                          |                                                                     |                                                               |                                                                               |    |
|---------------------------------------------------------------|--------------------------------------------------------------------------------------------------------------------------|---------------------------------------------------------------------|---------------------------------------------------------------|-------------------------------------------------------------------------------|----|
| Co(II) metal-organic framework                                | CoCl <sub>2</sub> ·6H <sub>2</sub> O, H <sub>4</sub> L, phen and CH <sub>3</sub> CN                                      | heated at 140°C for 3 days.                                         | 1.79 μM of Fe <sup>3+</sup><br>35.4 μM of Al <sup>3+</sup>    | 0 μM to 600 μM for Fe <sup>3+</sup><br>126 μM to 1.26 mM for Al <sup>3+</sup> | 14 |
| A novel colorimetric Schiff-base receptor                     | 2-amino-3-methylpyridine, absolute ethanol, 2-hydroxy-5-((2-nitrophenyl) diazenyl) benzaldehyde and triethylamine        | heated in a water bath for 3 h, separated and washed with hot EtOH. | 4.98 μM of Fe <sup>3+</sup><br>4.03 μM of Al <sup>3+</sup>    | ----                                                                          | 15 |
| A cation chemoprobe bearing naphthol O-H and imine group      | 2-hydroxy-1-naphthaldehyde, 5-methyl-2-amine pyridine and ethanol                                                        | heated at 60°C for 5 hours                                          | 0.1 μM of Fe <sup>3+</sup><br>0.43 μM of Al <sup>3+</sup>     | 0 μM to 100 μM for Fe <sup>3+</sup><br>0 μM to 100 μM for Al <sup>3+</sup>    | 16 |
| A fluorescent-colorimetric chemosensor based on a Schiff base | 2-hydroxy-1-naphthaldehyde, 5-aminosalicylic acid and ethanol                                                            | 70°C for 24 h                                                       | 0.358 μM of Fe <sup>3+</sup><br>0.489 μM of Al <sup>3+</sup>  | 2 μM to 20 μM for Fe <sup>3+</sup><br>2 μM to 7 μM for Al <sup>3+</sup>       | 17 |
| A naphthylamide based fluorescent chemosensor                 | TPP, TBAB, 1-hydroxy-2-naphthoic acid, 1,2-phenylenediamine and methanol                                                 | heated in an oil bath at 120°C for 1 h, stirred for 30 min          | 0.0352 μM of Fe <sup>3+</sup><br>5.022 μM of Al <sup>3+</sup> | 0 μM to 200 μM for Fe <sup>3+</sup><br>0 μM to 80 μM for Al <sup>3+</sup>     | 18 |
| A pillar-like 3D lanthanide-organic framework (Eu-MOF)        | H <sub>4</sub> L, Eu(NO <sub>3</sub> ) <sub>3</sub> ·6H <sub>2</sub> O, NaAc·3H <sub>2</sub> O, Hac and H <sub>2</sub> O | 190°C for 48 h                                                      | 0.39 μM of Fe <sup>3+</sup><br>0.084 μM of Al <sup>3+</sup>   | 0.01 μM to 220 μM for Fe <sup>3+</sup><br>0 μM to 500 μM for Al <sup>3+</sup> | 19 |
| 2,6-diaminopyridine-coupled rhodamines                        | 2,6-diaminopyridine, rhodamine acid chloride, ammonium formate, acetonitrile                                             | reflux 4 h, reaction 10 h, reflux 10 h                              | 2.79 μM of Fe <sup>3+</sup><br>2.43 μM of Al <sup>3+</sup>    | 120 μM to 180 μM for Fe <sup>3+</sup><br>60 μM to 100 μM for Al <sup>3+</sup> | 20 |
| Zn(II)-based MOF                                              | Zn(NO <sub>3</sub> ) <sub>2</sub> ·6H <sub>2</sub> O, H <sub>2</sub> DHT, BPP, DMF and H <sub>2</sub> O                  | heated at 150 °C for 48 h                                           | 0.446 μM of Fe <sup>3+</sup><br>0.269 μM of Al <sup>3+</sup>  | 0 μM to 7 μM for Fe <sup>3+</sup><br>0 μM to 40 μM for Al <sup>3+</sup>       | 21 |

|                                                    |                                                                                                                                                                                                                                                                                                                |                                                                                                          |                                                              |                                                                            |           |
|----------------------------------------------------|----------------------------------------------------------------------------------------------------------------------------------------------------------------------------------------------------------------------------------------------------------------------------------------------------------------|----------------------------------------------------------------------------------------------------------|--------------------------------------------------------------|----------------------------------------------------------------------------|-----------|
| A tetraphenyl ethylene-based zinc complex          | 2-bromo-1,1,2-triphenylethylene, pyridine-4-boronic acid, tetrabutylammonium bromide, Pd[P(C <sub>6</sub> H <sub>5</sub> ) <sub>3</sub> ] <sub>4</sub> , K <sub>2</sub> CO <sub>3</sub> , DMF, dimethyl-5-(bromomethyl) isophthalate, acetonitrile, HCl, ZnCl <sub>2</sub> , acetonitrile and H <sub>2</sub> O | stirred under an N <sub>2</sub> atmosphere at 100°C for 24 h, 100°C for 12 h, heated at 120°C for 3 days | 0.31 μM of Fe <sup>3+</sup><br>0.913 μM of Al <sup>3+</sup>  | 0 μM to 40 μM for Fe <sup>3+</sup><br>0 μM to 40 μM for Al <sup>3+</sup>   | 22        |
| A brand-new Cd <sup>II</sup> -based MOF (JXUST-18) | Cd(NO <sub>3</sub> ) <sub>2</sub> ·4H <sub>2</sub> O, BTBD, H <sub>2</sub> AIC, N,N-dimethylformamide (DMF) and deionized water                                                                                                                                                                                | ultrasonic processing for 2 min and stirring for 10 min, heated to 120°C for one day.                    | 0.196 μM of Fe <sup>3+</sup><br>0.184 μM of Al <sup>3+</sup> | 0 μM to 10 μM for Fe <sup>3+</sup><br>0 μM to 5 μM for Al <sup>3+</sup>    | 23        |
| Terbium-based MOF                                  | Tb(NO <sub>3</sub> ) <sub>3</sub> ·6H <sub>2</sub> O, 5-aminoisophthalic acid, DMF, H <sub>2</sub> O and ethanol                                                                                                                                                                                               | heated at 150°C for 12 h; washed three times.                                                            | 0.91 μM of Fe <sup>3+</sup><br>6.1 μM of Al <sup>3+</sup>    | 0 μM to 400 μM for Fe <sup>3+</sup><br>0 μM to 1.0 mM for Al <sup>3+</sup> | This work |

**Table S2** The specific surface areas of Tb-MOF before and after recognizing Al<sup>3+</sup>.

| Sample                  | S <sub>BET</sub> (m <sup>2</sup> g <sup>-1</sup> ) | S <sub>BJH</sub> (m <sup>2</sup> g <sup>-1</sup> ) | V <sub>total</sub> (cm <sup>3</sup> g <sup>-1</sup> ) | D <sub>average</sub> (nm) |
|-------------------------|----------------------------------------------------|----------------------------------------------------|-------------------------------------------------------|---------------------------|
| Tb-MOF                  | 8.06                                               | 4.79                                               | 0.048                                                 | 15.27                     |
| Tb-MOF+Al <sup>3+</sup> | 16.54                                              | 14.95                                              | 0.056                                                 | 17.90                     |

S<sub>BET</sub>: BET surface area, S<sub>BJH</sub>: BJH adsorption cumulative surface area of pores, V<sub>total</sub>:

Total volume in pores, D<sub>average</sub>: BJH adsorption average pore diameter.

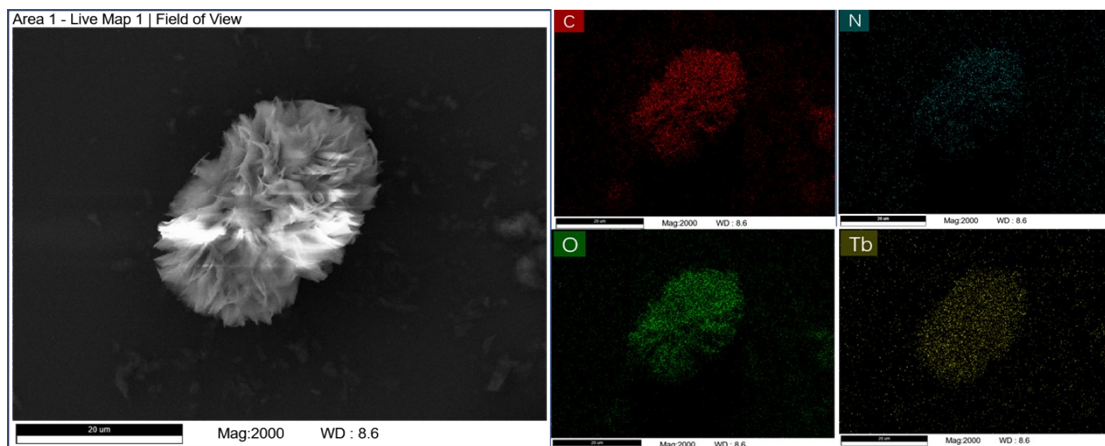

**Fig. S1** Scanning electron microscope (SEM) images and EDS elemental mappings of Tb-MOF.

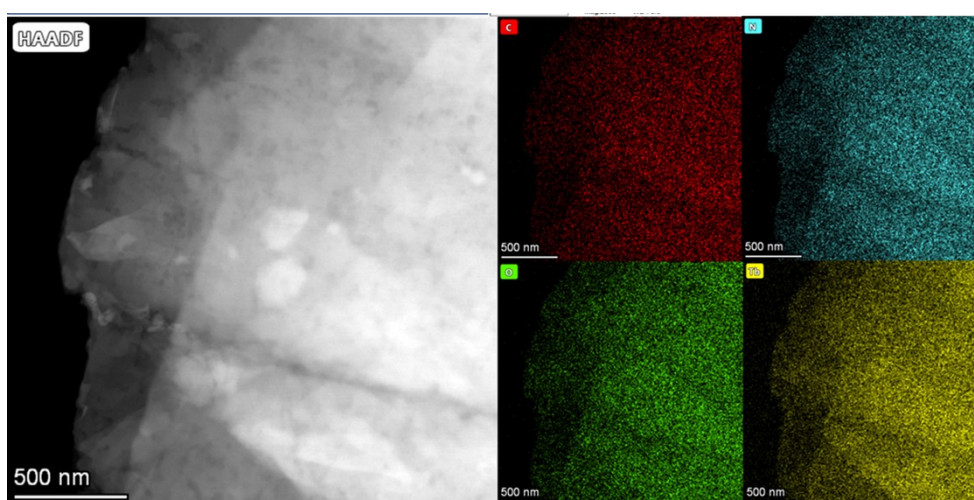

**Fig. S2** High-angle annular dark-field scanning transmission electron microscopy (HAADF-STEM) images and EDS elemental mappings of Tb-MOF.

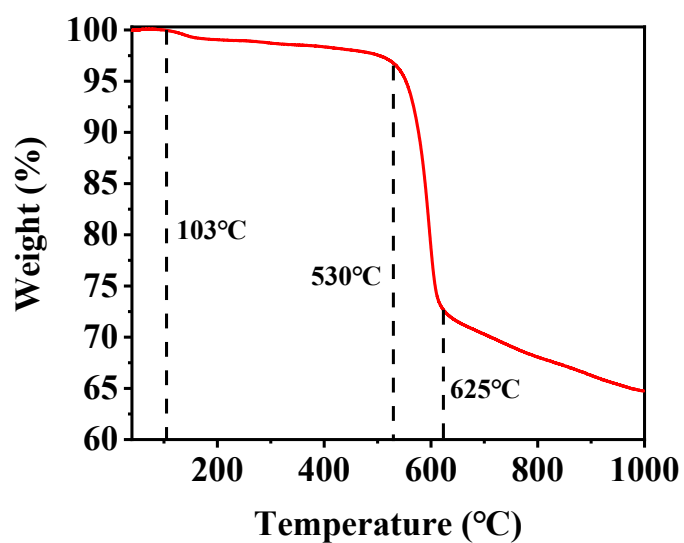

**Fig. S3** Thermal gravimetric analysis for Tb-MOF.

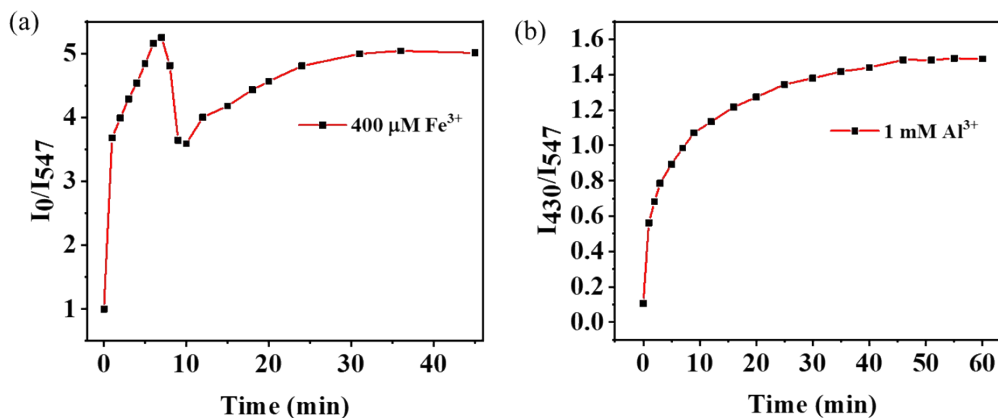

**Fig. S4** (a) Time-dependent emission spectra for the Tb-MOF in aqueous solution containing 400  $\mu\text{M}$   $\text{Fe}^{3+}$ ; (b) Time-dependent emission spectra for Tb-MOF in aqueous solution containing 1.0 mM  $\text{Al}^{3+}$ .

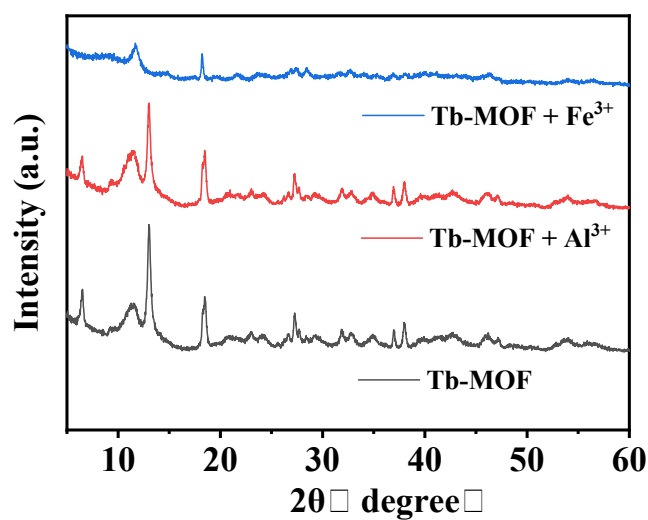

**Fig. S5** XRD spectra before and after Tb-MOF identifying  $\text{Fe}^{3+}$  and  $\text{Al}^{3+}$ .

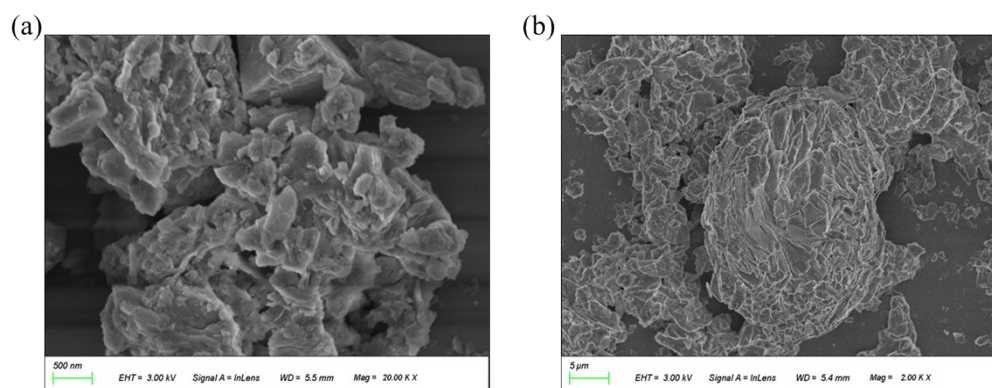

**Fig. S6** The SEM images of Tb-MOF after recognizing (a)  $\text{Fe}^{3+}$  and (b)  $\text{Al}^{3+}$ .

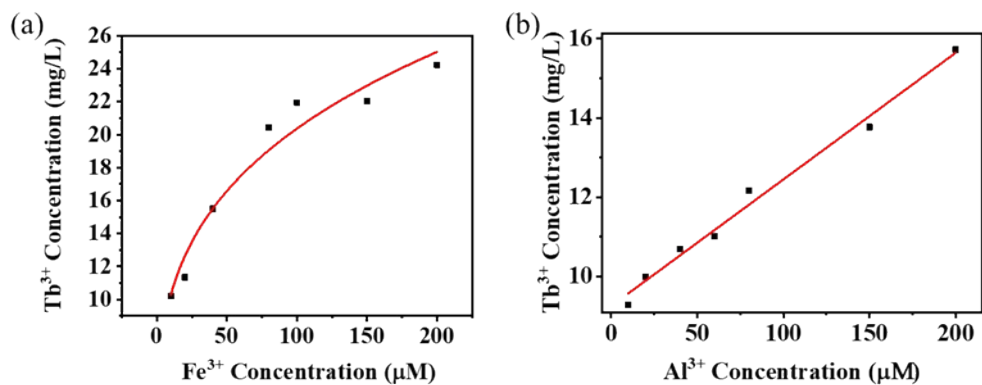

**Fig. S7**  $\text{Tb}^{3+}$  concentration changes in the presence of  $\text{Fe}^{3+}$  and  $\text{Al}^{3+}$  at different concentrations.

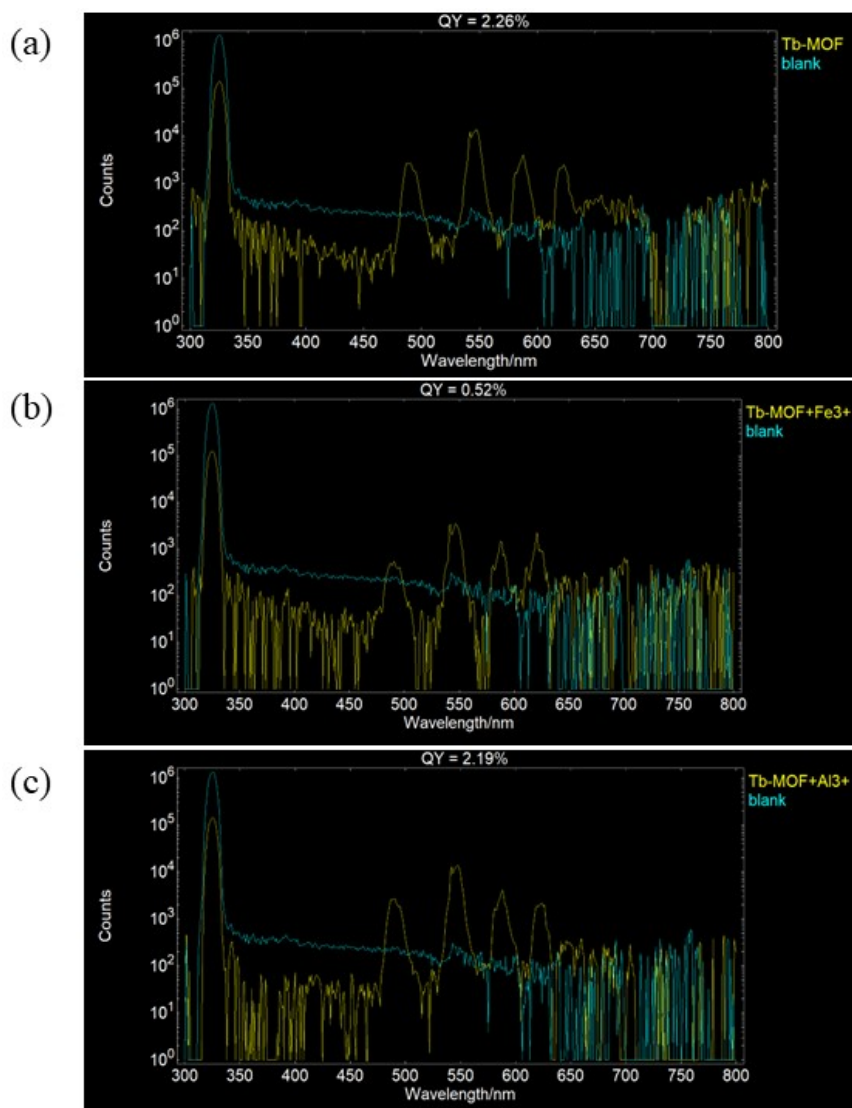

**Fig. S8** Quantum yield of (a)  $\text{Tb-MOF}$ ; (b)  $\text{Tb-MOF}$  after recognizing  $\text{Fe}^{3+}$ ; (c)  $\text{Tb-MOF}$  after recognizing  $\text{Al}^{3+}$ .



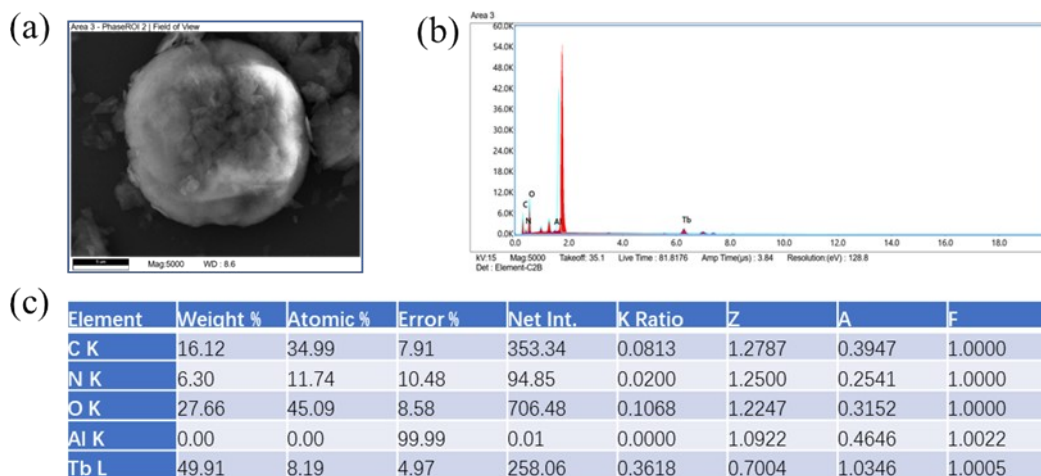

**Fig. S9** EDS analysis of Tb-MOF after recognizing  $\text{Al}^{3+}$ .

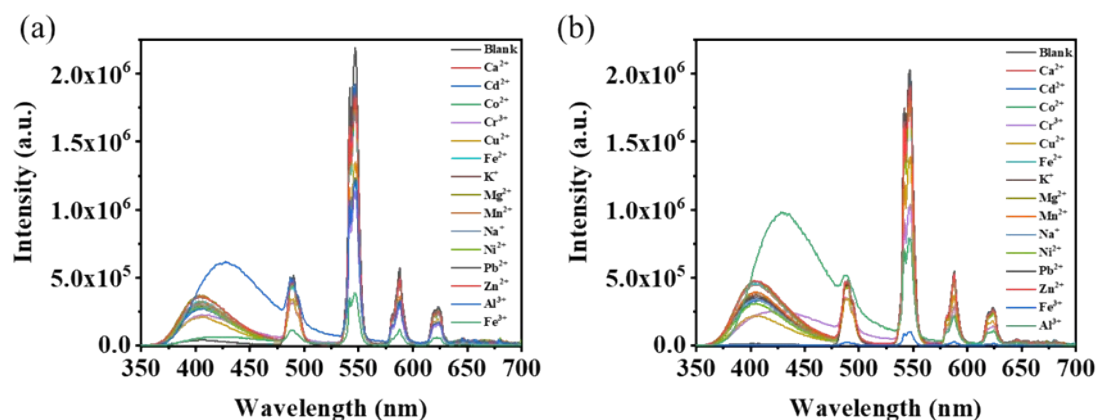

**Fig. S10** Fluorescence spectra of Tb-MOF in different metal ion solutions.

### Notes and references

1. A. Kundu, J. Pitchaimani, V. Madhu, P. Sakthivel, R. Ganesamoorthy and S. P. Anthony, *Journal of Fluorescence*, 2017, **27**, 491-500.
2. S. Suganya, J. W. Namgoong, A. K. Mutyala, S. Velmathi, J. P. Kim and J. S. Park, *Journal of Photochemistry and Photobiology A: Chemistry*, 2017, **344**, 36-41.
3. K. P. Wang, J. P. Chen, S. J. Zhang, Y. Lei, H. Zhong, S. Chen, X. H. Zhou and Z. Q. Hu, *Analytical and Bioanalytical Chemistry*, 2017, **409**, 5547-5554.
4. W. Wang, Y. Li, P. V. Reddy, X. Zhang and D. Yuan, *Sensors and Actuators B: Chemical*, 2017, **252**, 159-164.
5. S. Chand, M. Mondal, S. C. Pal, A. Pal, S. Maji, D. Mandal and M. C. Das, *New Journal of Chemistry*, 2018, **42**, 12865-12871.
6. Y. Dai, J. J. Zhang, S. Q. Liu, H. Zhou, Y. J. Sun, Y. Z. Pan, J. Ni and J. S. Yang, *Chemistry*, 2018, **24**, 9555-9564.
7. V. Kumar, B. Sk, S. Kundu and A. Patra, *Journal of Materials Chemistry C*, 2018, **6**, 12086-12094.
8. A. Kundu and S. P. Anthony, *Spectrochimica Acta Part A: Molecular and Biomolecular Spectroscopy*, 2018, **189**, 342-348.

9. R. Lv, Z. Chen, X. Fu, B. Yang, H. Li, J. Su, W. Gu and X. Liu, *Journal of Solid State Chemistry*, 2018, **259**, 67-72.
10. H. Yao, J. Wang, S. S. Song, Y. Q. Fan, X. W. Guan, Q. Zhou, T. B. Wei, Q. Lin and Y. M. Zhang, *New Journal of Chemistry*, 2018, **42**, 18059-18065.
11. X. Yue, C. Li and Z. Yang, *Journal of Photochemistry and Photobiology A: Chemistry*, 2018, **351**, 1-7.
12. M. Arici, *New Journal of Chemistry*, 2019, **43**, 3690-3697.
13. S. K. Dinda, A. Upadhyay, S. Polepalli, M. Althaf Hussain and C. P. Rao, *ACS Omega*, 2019, **4**, 7723-7733.
14. Y. Liu, C. Liu, X. Zhang, L. Liu, C. Ge, X. Zhuang, N. Zhang, Q. Yang, Y.-Q. Huang and Z. Zhang, *Journal of Solid State Chemistry*, 2019, **272**, 1-8.
15. M. Orojloo and S. Amani, *Polycyclic Aromatic Compounds*, 2019, **41**, 33-46.
16. Z. Qiao, Y. Wu, B. Tang, R. Perestrelo and R. Bhalla, *Tetrahedron Letters*, 2019, **60**, 150918.
17. M. Zhang, L. Gong, C. Sun, W. Li, Z. Chang and D. Qi, *Spectrochimica Acta Part A: Molecular and Biomolecular Spectroscopy*, 2019, **214**, 7-13.
18. N. Ahfad, G. Mohammadnezhad, S. Meghdadi and H. Farrokhpour, *Spectrochimica Acta Part A: Molecular and Biomolecular Spectroscopy*, 2020, **228**, 117753.
19. H. Guo, N. Wu, R. Xue, H. Liu, L. Li, M. Wang, W. Yao, Q. Li and W. Yang, *Colloids and Surfaces A: Physicochemical and Engineering Aspects*, 2020, **585**, 124094.
20. S. Panja, S. Mondal, S. Ghosh, U. Ghosh and K. Ghosh, *ACS Omega*, 2020, **5**, 13984-13993.
21. S. T. Wang, X. Zheng, S. H. Zhang, G. Li and Y. Xiao, *CrystEngComm*, 2021, **23**, 4059-4068.
22. R. Xu, Q. Wu, C. Xing, H. Wang, W. Xu, X. Meng and H. Hou, *Polyhedron*, 2021, **197**, 115056.
23. D. G. Cai, C. Q. Qiu, Z. H. Zhu, T. F. Zheng, W. J. Wei, J. L. Chen, S. J. Liu and H. R. Wen, *Inorganic Chemistry*, 2022, **61**, 14770-14777.
